# Supplementary material for: Acute Carotid Artery Stenting Versus Balloon Angioplasty for Tandem Occlusions: A Systematic Review and Meta‐Analysis
Source: PubMed Central journal article supplement — J Am Heart Assoc. 2022 Jan 13;11(2):e022335. doi: 10.1161/JAHA.121.022335 (PMC9238531; doi:10.1161/jaha.121.022335), 2022-01-13

# **SUPPLEMENTAL MATERIAL**

## Data S1.

### SUPPLEMENTAL METHODS Search strategy

Database: MEDLINE

((("Carotid Stenosis"[MeSH Terms] AND "Carotid Artery, Internal" [MeSH Terms] OR (internal carotid [Text Word] OR ICA [Text Word]) AND (occlusion [Text Word] OR occluded [Text Word] OR ICAO [Text Word])) AND (acute stroke[MeSH Terms]) OR CVA [Text Word] OR "acute cerebrovascular accident" [MeSH Terms] OR stroke [Text Word] AND (thrombectomy[MeSH Terms]) OR MECHANICAL THROMBECTOMY [Text Word] ) ) AND (stent [MeSH Terms] OR "TANDEM occlusion" [TEXT WORD])) AND ("2015"[Date - Publication] : "2020"[Date - Publication])

Total: 572 references

Database: EMBASE

('internal carotid artery occlusion'/exp OR 'carotid artery disease'/exp OR 'tandem occlusion') AND ('cerebrovascular accident'/exp OR stroke:ab,ti) AND ('mechanical thrombectomy'/exp OR 'thrombectomy':ab,ti) AND [2015-2020]/py

Total: 699 references

Database: WEB OF SCIENCE

((TS=("carotid artery occlu\*" OR "internal carotid\*") AND (TS=("acute stroke" or "cerebrovascular accident") ) AND (TS=("mechanical thrombectomy" OR "stent" or "thrombectomy") ))) AND DOCUMENT TYPES: (Article OR Review) Indexes=SCI-EXPANDED, SSCI, A&HCI, CPCI-S, CPCI-SSH, BKCI-S, BKCI-SSH, ESCI, CCR-EXPANDED, IC Timespan=2015-2020

Total: 133 references

**Table S1. Characteristics of the studies included in the systematic review.**

| Study ID                 | Design                      | Primary outcomes                                 | N   | Interventions                        | Endovascular approach           | IV tPA | FU (%)      | Antithrombotic regimen                                             | Additional outcomes                                     |
|--------------------------|-----------------------------|--------------------------------------------------|-----|--------------------------------------|---------------------------------|--------|-------------|--------------------------------------------------------------------|---------------------------------------------------------|
| Yilmaz, 2017, Germany    | Retrospective, SC           | SICH (ECASS II within 24h)<br>mRS-DC             | 47  | aCAS (n=47)<br>DLS (20),<br>SLS (27) | Antero                          | 51%    | 72h         | Previous APT (-): 500mg IV ASA before stent.<br>CPD at discretion. | Stent patency (by US):<br>TF 37%<br>SLS, 50%<br>DLS.    |
| Pfaff, 2019, MN (Europe) | Retrospective, MC (7)       | SICH (ECASS II/III)<br>mRS-DC.<br>TICI           | 160 | aCAS (n=160)<br>DLS                  | Antero (73.1%)<br>Retro (26.9%) | 61%    | 72h         | Post procedural: ASA alone/<br>ASA+ CPD or ticagrelor.             | Acute TF (20.6%) and occlusion at 72h and previous APT. |
| Maus, 2017, MN           | Retrospective, MC (4), PCDB | SICH (≥4pts)<br>mRS-DC - 90d.<br>TICI            | 197 | aCAS (n=197)                         | Antero (55.3%)<br>Retro (44.7%) | 58%    | 90d (81%)   | APT differed between centers.                                      | Effect of contralateral CS (-).                         |
| Lucena, 2016, Brazil     | Retrospective, SC           | SICH (SITS-MOST ≥4pts at 72h)<br>mRS 90d<br>TICI | 20  | aCAS (n=20)                          | Antero                          | 60%    | 90d<br>100% | Dual APT started at 24h after CAS for 3m.                          |                                                         |

|                       |                                    |                                                      |     |                                       |                                 |      |               |                                                                         |                                         |
|-----------------------|------------------------------------|------------------------------------------------------|-----|---------------------------------------|---------------------------------|------|---------------|-------------------------------------------------------------------------|-----------------------------------------|
| Heck, 2015, Usa       | Retros p, SC, PCDB                 | SICH (SITS-MOST) mRS 90d<br>TICI                     | 23  | aCAS (n=23)                           | Antero                          | 30 % | 90d<br>100 %  | ACT or APT at discretion.                                               |                                         |
| Anadani, 2019, MN     | Retros p, MC, TITAN Registry, PCDB | SICH (ECASS II) mRS 90d.<br>TICI                     | 205 | aCAS (n=205)                          | Antero (66.8%)<br>Retro (33.2%) | 60 % | 90d           | APT differed between centers. PO meds: NA                               |                                         |
| Park, 2019, Korea     | Retros p, SC                       | SICH (ECASS III at 24h) mRS 90d<br>TICI              | 42  | aCAS (n=42)                           | Antero                          | 69 % | 90d           | tPA (+): dual APT after 24h.<br>tPA (-): dual APT load and maintenance. | Stenosis vs. complete occlusion of ICA. |
| Lockau, 2015, Germany | Retros p, SC                       | SICH ( $\geq 4$ pts at 18 $\pm$ 6 h) mRS 90d<br>TICI | 37  | aCAS (n=37)                           | Antero (32%)<br>Retro (67.6%)   | 54 % | 90d           | APT (-): bolus tirofiban, then for 24h. Dual APT load and for 3m.       | Early neurological improvement.         |
| Maus, 2018, Germany   | Retros p, MC (4) PCDB              | SICH ( $\geq 4$ pts) mRS 90d.<br>TICI                | 171 | aCAS (n=165) (6 SRC after CAS, no MT) | Antero (59%)<br>Retro (41%)     | 62 % | 90d<br>(88 %) | APT on each center.<br>Used: tirofiban, ASA, abciximab.                 | Best first approach                     |

|                                 |                          |                                        |     |                                  |                             |      |              |                                                                                                 |                                                                                 |
|---------------------------------|--------------------------|----------------------------------------|-----|----------------------------------|-----------------------------|------|--------------|-------------------------------------------------------------------------------------------------|---------------------------------------------------------------------------------|
| Spiotta, 2015, USA              | Retros p, SC             | SICH<br>mRS 90d.<br>TICI               | 16  | aCAS (n=16)                      | Antero                      | 50 % | 90d<br>100 % | IA Abciximab (0.25 mg/ kg) at CAS.<br><br>Dual APT load and maintenance.                        |                                                                                 |
| Yoon, 2015, China               | Retros p, MC (2)<br>PCDB | SICH (≥4pts)<br>mRS 90d<br>TICI        | 42  | aCAS (n=42)<br>(7 SRC after CAS) | Antero                      | 64 % | 90d          | 45% URK in MT<br><br>Dual APT by NGT immediately PO, for 3m.                                    | Predictors for favorable outcome.<br>In-stent thrombosis (1).                   |
| Mpotsaris, 2017, Germany        | Retros p, SC             | SICH (ECAS S 18±6 h).<br>mRS 90d       | 63  | aCAS (n=63)                      | Antero (27%)<br>Retro (73%) | 52 % | 90d (97 %)   | Abciximab bolus, followed by dual APT for 3m after 12–24h NCCT                                  |                                                                                 |
| Steglich-Arnholm, 2015, Denmark | Retros p, SC             | SICH (≥4pts at 24h)<br>mRS 90d<br>TICI | 62  | aCAS (n=47)<br>15 SRC after CAS  | NA                          | 85 % | 90d          | Load of IV ASA and/or GPIIb/IIIa (eptifibatide or abciximab).<br><br>Dual APT after FU imaging. | Stent patency: 8 TF, 4 occlusions at 90d<br><br>Early clinical improvement 72h. |
| Behme, 2015, Germany            | Retros p, MC (4)<br>PCDB | SICH (ECAS S)<br>mRS 90d<br>TICI       | 170 | aCAS (n=170)                     | Antero (89%)<br>Retro (11%) | 72 % | 90d          | APT on each center.                                                                             | Risk factors for SICH                                                           |

|                           |                      |                                                     |                              |                                |        |      |                          |                                                                                 |                     |
|---------------------------|----------------------|-----------------------------------------------------|------------------------------|--------------------------------|--------|------|--------------------------|---------------------------------------------------------------------------------|---------------------|
| Cohen, 2015, Israel       | Retros p, SC         | SICH (≥4pts at 36h)<br>mRS 90d and 6 months<br>TICI | 24                           | aCAS (n=24)                    | Antero | 42 % | 90d (77 %)<br>6 m<br>90% | Previous APT (-): ASA 300mg.<br>After (-) CT, added CPD 300mg. dual APT for 2m. |                     |
| Sadeh-Gonik, 2018, France | Retros p, SC<br>PCDB | SICH (≥4pts at 24h)<br>mRS 90d<br>TICI              | 46                           | aCAS (n=12)                    | Retro  | 76 % | 90d (93 %)               | NA                                                                              |                     |
| Fahed, 2016, France       | Retros p, SC         | SICH (ECAS II at 24h and 72h)<br>mRS 90d.<br>TICI   | 70                           | aCAS (n=37)<br>No stent (n=33) | NA     | 49 % | 90d (96 %)               | CAS: IV ASA bolus followed by a dual APT if (-) 24h NCCT                        | NIHSS at 24h and 7d |
| Bucke, 2018, Germany      | Retros p, SC<br>PCDB | SICH (SWIFT PRIME at 24h)<br>mRS 90d<br>TICI        | 107<br>1L<br>VO<br>222<br>TO | aCAS (n=222)<br>LVO MT (n=849) | Antero | 24 % | 90d                      | IV dual APT or Ticagrelor load prior to CAS (at discretion)                     |                     |

|                              |                           |                                  |                       |                                           |                             |     |                      |                                                                                                                                     |                                                    |
|------------------------------|---------------------------|----------------------------------|-----------------------|-------------------------------------------|-----------------------------|-----|----------------------|-------------------------------------------------------------------------------------------------------------------------------------|----------------------------------------------------|
| Rodriguez-Lopez, 2018, Spain | Retrospective, SC         | mRS 90d<br>TICI                  | 66                    | aCAS (n=33)<br>MT alone (33)              | Retro                       | 54% | 90d                  | NA                                                                                                                                  |                                                    |
| Runck, 2019, Germany         | Retrospective, SC         | SICH (ECASS)<br>TICI             | 66                    | aCAS+ MT (45)<br>aCAS not TO (21)         | Antero (80%)<br>Retro (20%) | 64% | DC                   | APT (-): ASA after CAS and PO tirofiban. At 4h before cessation of the infusion, a ticagrelor load, then for min 6w and ASA for 6m. | In-stent thrombosis (22%).                         |
| Maurer, 2015, Germany        | Retrospective, SC         | SICH (24h)<br>mRS<br>DC<br>TICI  | 43                    | aCAS (n=38),<br>BA (n=5)                  | Antero                      | 88% | DC                   | Loading dose of CPD or ticagrelor                                                                                                   |                                                    |
| Lescher, 2015, Germany       | Retrospective, SC         | SICH<br>mRS 90d<br>TICI          | 39                    | aCAS (n=09),<br>BA (n=30)                 | Retro                       | 74% | 90d                  | CPD load before CAS. Maintenance dual APT the next day.                                                                             |                                                    |
| Akpinar, 2017, Turkey        | Retrospective, SC<br>PCDB | SICH (≥4pts)<br>mRS<br>TICI      | 15                    | BA (n=15),<br>Delayed 7-10d<br>CAS (n=10) | Antero                      | 53% | 7-10, 30 and 90 days | CAS (+): dual APT 5d before CAS.                                                                                                    |                                                    |
| Slawski, 2018, USA           | Retrospective, SC<br>PCDB | SICH (≥4pts)<br>mRS 90d.<br>TICI | 45<br>TO.<br>39<br>Tx | aCAS (n=27),<br>CEA (n=12)                | Retro                       | 46% | 90d                  | CAS: Dual APT before EPD. Low-dose heparin (2000-3000 U).                                                                           | Re-occlusion 3/12.<br>In-stent thrombosis (US 24h) |

|                        |                                      |                                           |                      |                                            |                             |     |             |                                                                                                                                |                                                            |
|------------------------|--------------------------------------|-------------------------------------------|----------------------|--------------------------------------------|-----------------------------|-----|-------------|--------------------------------------------------------------------------------------------------------------------------------|------------------------------------------------------------|
|                        |                                      |                                           |                      |                                            |                             |     |             | CEA: ASA and a heparin bolus (5000 U).                                                                                         |                                                            |
| Poppe, 2019, Canada    | RCT pilot study. SC                  | SICH (ECASS II at 24h)<br>mRS 90d<br>TICI | 24                   | aCAS (n=11), BA (n=02)                     | Antero (18%)<br>Retro (82%) | 75% | 90d<br>100% | No strict rec.<br>tpA(+): ASA if (-) APT or CPD if (+)<br>Dual APT after imaging at 6–24h.<br>tpA(-): dual APT immediately PO. | PO stenosis                                                |
| Kim, 2019, Korea       | Retros p, MC (17)<br>PCDB            | SICH<br>mRS 90d<br>TICI                   | 955 MT<br>,<br>75 TO | aCAS (n=56), BA (n=19)                     | Antero (90%)<br>Retro (10%) | 56% | 90d         | CAS: PO APT on each center.                                                                                                    | Re-occlusion (9%)<br>Factors of success TICI               |
| Papanagiotou, 2018, MN | Retros p, MC (18)<br>TITAN registry  | SICH (≥4pts at 24h)<br>mRS 90d<br>TICI    | 482                  | aCAS (n=322), BA (n=52)<br>MT alone (108)  | Antero                      | 61% | 90d         | APT depended on each center.                                                                                                   | Efficacy and safety outcomes according to APT type.        |
| Jadhav, 2018, USA      | Retros p, MC (55)<br>PCDB<br>STRATIS | SICH (SWIFT PRIME at 24h)<br>mRS 90d      | 147                  | aCAS (n=80), BA (n=43), delayed CAS (n=24) | Antero (47%)<br>Retro (53%) | 74% | 90d (93%)   | NA                                                                                                                             | Predictors of good outcomes in TO, and predictors of aCAS. |



|                        | Registry                  | TICI                                        |    |                                                                   |                             |     |              |                                                                                                                     |                                                                       |
|------------------------|---------------------------|---------------------------------------------|----|-------------------------------------------------------------------|-----------------------------|-----|--------------|---------------------------------------------------------------------------------------------------------------------|-----------------------------------------------------------------------|
| Labeyrie, 2018, France | Retrospective, SC<br>PCDB | ICH (ECASS > 1 at 48h)<br>mRS 90d<br>TICI   | 49 | aCAS (n=16),<br>BA (n=9).<br><br>Coils (n=12),<br>Medicall (n=13) | NA                          | 67% | 90d<br>(86%) | Before stent positioning:<br>IV ASA + CPD by NGT, then for 3m<br><br>*additional IV anti-GP IIb/IIIa at discretion. | Early embolic recurrence (9/64).<br><br>Stroke recurrence at 30 days. |
| Kang, 2019, Korea      | Retrospective, SC<br>PCDB | SICH (≥4pts at 24h)<br>mRS 90d<br>TICI      | 62 | aCAS (n=40),<br>BA (n=22)                                         | Antero (22%)<br>Retro (78%) | 40% | 90d<br>1y    | Neurologist's discretion:<br><br>Immediate/delayed (>1h)<br>Dual /single APT                                        | Long-term stent patency                                               |
| Vu Dang, 2020, Vietnam | Retrospective, SC         | ICH (Heidelberg 18±6 h)<br>mRS 90d<br>TICI  | 17 | aCAS (n=10),<br>BA (n=07)                                         | Antero                      | 59% | 90d          | 4000 UI heparin at CAS.<br><br>Dual APT for 3m, then ASA.                                                           | Early clinical improvement at 24h                                     |
| Li, 2018, China        | Retrospective, SC         | SICH (Heidelberg at 36h)<br>mRS 90d<br>TICI | 37 | aCAS (n=19),<br>BA (n=18)                                         | NA                          | 32% | 90d          | tpA(+): dual APT after 24h and for min 3m.<br><br>tpA(-): dual APT load and maintenance.                            | In-stent stenosis at 3m (1/11)                                        |

|                                      |                                |                                                 |                             |                                                             |                                   |         |                         |                                                                                                                                         |                                                     |
|--------------------------------------|--------------------------------|-------------------------------------------------|-----------------------------|-------------------------------------------------------------|-----------------------------------|---------|-------------------------|-----------------------------------------------------------------------------------------------------------------------------------------|-----------------------------------------------------|
| Walloch<br>a, 2019,<br>Germany       | Retros<br>p, SC<br>PCDB        | SICH<br>(≥4pts)<br>mRS<br>90d<br>TICI           | 163                         | aCAS<br>(n=149),<br>BA<br>(n=14)                            | Antero<br>(52%)<br>Retro<br>(48%) | 55<br>% | 90d-<br>5y<br>(97<br>%) | CAS: IV<br>ASA.<br><br>IV heparin in<br>some<br>procedures.<br><br>CPD 24h<br>after.<br><br>Dual APT for<br>4w, followed<br>by mono-APT | Stent<br>patency:<br>acute re-<br>occlusion<br>5.4% |
| Eker,<br>2018,<br>Switzerland<br>and | Retros<br>p, MC<br>(2)<br>PCDB | SICH<br>(≥4pts<br>at 24h)<br>mRS<br>90d<br>TICI | 121<br>TO<br><br>456<br>LVO | aCAS<br>(n=98),<br>BA<br>(n=9),<br>delayed<br>CAS<br>(n=14) | Antero<br>(38%)<br>Retro<br>(62%) | 52<br>% | 90d<br>(97<br>%)        | IV ASA prior<br>to CAS. Dual<br>APT after (-)<br>NCCT within<br>24h                                                                     | Acute in-<br>stent<br>thrombosis<br>(2/98)          |

aCAS stands for acute carotid artery stenting; ACT, anticoagulation therapy; Antero, antegrade; APT, antiplatelet therapy; ASA, acetylsalicylic acid; ATS, atorvastatin; BA, balloon angioplasty; CEA, carotid endarterectomy; CPD, clopidogrel; CS, carotid stenosis; d, days; DC, discharge; DLS, dual layer stent; ECASS II, European Cooperative Acute Stroke Study II; EPD, embolic protection device; FU, follow up; h, hours; IA, intra-arterial; IV, intravenous; LVO, large vessel occlusion; m, months; MC, multicenter; min, minimum; MN; multinational; mRS, Modified Rankin Scale; MT, mechanical thrombectomy; NA, not available; NCCT, non-contrast computerized tomography; NGT, nasogastric tube; NIHSS, The National Institutes of Health Stroke Scale; PCDB, prospectively collected database; PO, post-operative; RCT, randomized controlled trial; rec, recommendations; retro, retrograde; Retros, retrospective; SC, single center; SICH, symptomatic intracranial hemorrhage; SITS-MOST, Safe Implementation of Thrombolysis in Stroke-Monitoring Study; SLS, single layer stent; SRC, spontaneous recanalization; SWIFT PRIME, Solitaire with the Intention for Thrombectomy as Primary Endovascular Treatment trial; TF, thrombus formation; TICI, thrombolysis in cerebral infarction; TO, tandem occlusion; tpA, tissue plasminogen activator; Tx, treatment; U, units; URK, urokinase; US, ultrasound; w, weeks; and y, year.

**Table S2. Risk of bias assessment of studies included in the systematic review without control group.**

| National Institute of Health Quality Assessment Tool for before-after (pre-post) Studies |                |
|------------------------------------------------------------------------------------------|----------------|
| Study ID                                                                                 | Quality rating |
| Akpinar, 2017                                                                            | Fair           |
| Pfaff, 2019                                                                              | Fair           |
| Heck, 2015                                                                               | Fair           |
| Park, 2019                                                                               | Fair           |
| Maus, 2017                                                                               | Good           |
| Yoon, 2015                                                                               | Good           |
| Runck, 2019                                                                              | Fair           |
| Rodriguez-Lopez, 2018                                                                    | Fair           |
| Steglich-Arnholm, 2015                                                                   | Fair           |
| Sadeh-Gonik, 2018                                                                        | Fair           |
| Maurer, 2015                                                                             | Fair           |
| Behme, 2015                                                                              | Good           |
| Cohen, 2015                                                                              | Poor           |

**Table S3. Risk of bias assessment, RoB2 tool**

| Cochrane risk of bias in randomized trials (RoB 2)- Poppe, 2019 |                |
|-----------------------------------------------------------------|----------------|
| Domain                                                          | Classification |
| Randomization process                                           | Low            |
| Deviations from intended interventions                          | Some concerns  |
| Missing outcome data                                            | Low            |
| Measurement of the outcome                                      | Some concerns  |
| Selection of the reported result                                | Low            |
| Overall Bias                                                    | Some concerns  |

**Figure S1. Risk of bias assessment of studies included in the systematic review and meta-analysis – ROBINS I (A) summary per study. (B) summary per domain.**

A

|       |                    | Risk of bias domains |    |    |    |    |    |    | Overall |
|-------|--------------------|----------------------|----|----|----|----|----|----|---------|
|       |                    | D1                   | D2 | D3 | D4 | D5 | D6 | D7 |         |
| Study | Lescher, 2015      | -                    | +  | -  | +  | +  | -  | +  | -       |
|       | Lockau, 2015       | X                    | +  | +  | +  | +  | -  | +  | X       |
|       | Spiotta, 2015      | X                    | +  | +  | +  | X  | -  | +  | X       |
|       | Fahed, 2016        | X                    | +  | -  | +  | X  | -  | -  | X       |
|       | Lucena, 2016       | X                    | +  | +  | +  | +  | -  | +  | X       |
|       | Mpotsaris, 2017    | X                    | +  | +  | +  | X  | -  | +  | X       |
|       | Yilmaz, 2017       | -                    | +  | -  | +  | +  | -  | +  | -       |
|       | Bucke, 2018        | X                    | +  | -  | +  | X  | -  | -  | X       |
|       | Eker, 2018         | -                    | +  | -  | -  | +  | +  | -  | -       |
|       | Labeyrie, 2018     | -                    | +  | -  | -  | X  | -  | -  | X       |
|       | Li, 2018           | -                    | +  | -  | +  | X  | +  | +  | X       |
|       | Maus, 2018         | -                    | +  | -  | +  | -  | -  | +  | -       |
|       | Papanagiotou, 2018 | -                    | -  | -  | -  | -  | -  | -  | -       |
|       | Slawski, 2018      | -                    | +  | -  | +  | +  | -  | +  | -       |
|       | Anadani, 2019      | +                    | +  | +  | +  | -  | -  | +  | -       |
|       | Jadhav, 2019       | -                    | -  | -  | -  | -  | -  | +  | -       |
|       | Kang, 2019         | -                    | +  | -  | -  | -  | -  | -  | -       |
|       | Wallocha, 2019     | -                    | +  | X  | +  | +  | +  | +  | X       |
|       | Kim, 2020          | -                    | +  | +  | -  | +  | -  | -  | -       |
|       | Vu Dang, 2020      | -                    | +  | -  | +  | -  | -  | +  | -       |

Domains:  
D1: Bias due to confounding.  
D2: Bias due to selection of participants.  
D3: Bias in classification of interventions.  
D4: Bias due to deviations from intended interventions.  
D5: Bias due to missing data.  
D6: Bias in measurement of outcomes.  
D7: Bias in selection of the reported result.

Judgement  
 Serious  
 Moderate  
 Low

B

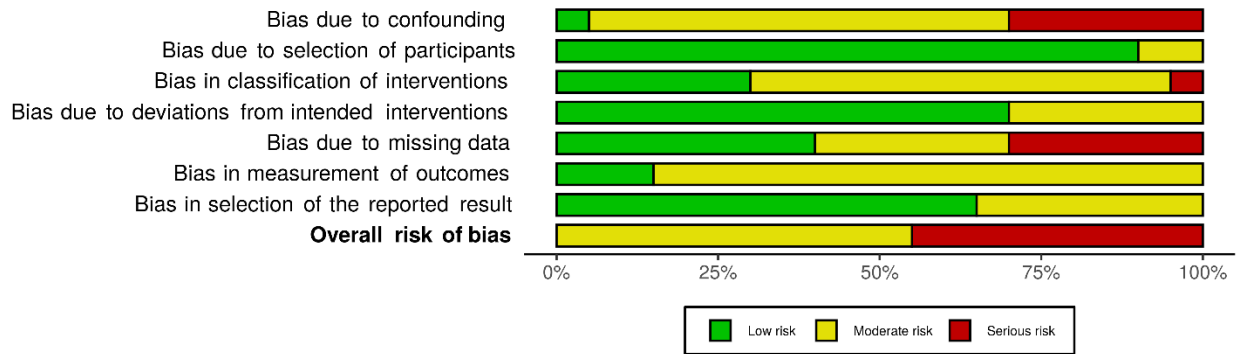

**Figure S2. Meta-analysis of Symptomatic intracranial hemorrhage (sICH) in patients with acute stenting with of intravenous tissue plasminogen activator (IV tpA) versus without IV tpA.**

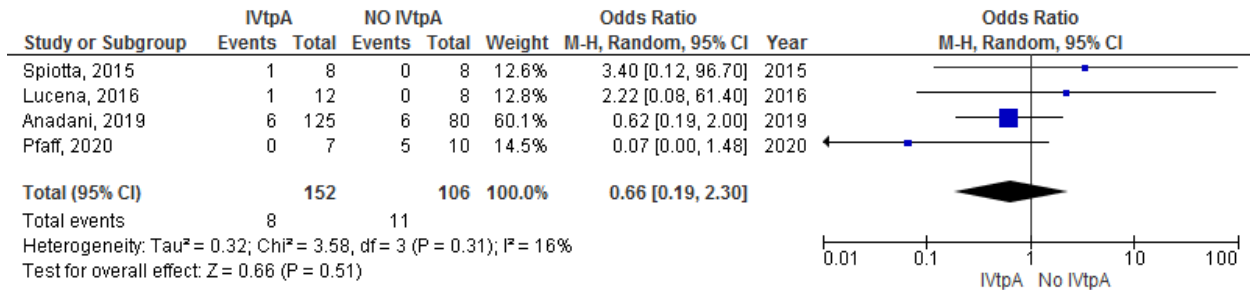

**Figure S3. Funnel plots and Egger's test results for (A) functional outcome at 90 days (modified Rankin Scale (mRS) score of 0–2), (B) good reperfusion status Thrombolysis in Cerebral Infarction (TICI) 2b-3, (C) Symptomatic intracranial hemorrhage (sICH), and (D) mortality as outcomes in acute stenting versus angioplasty studies showing no asymmetry.**

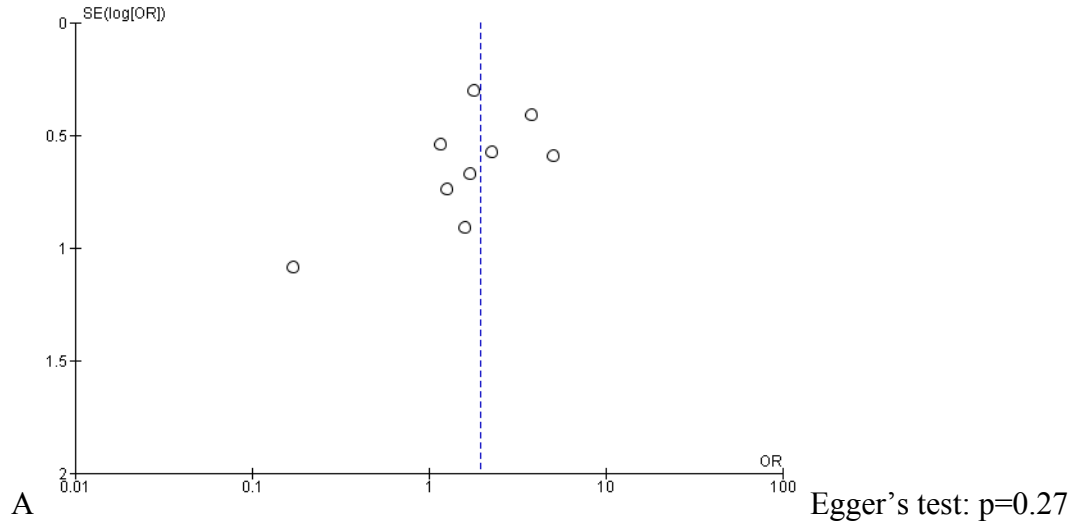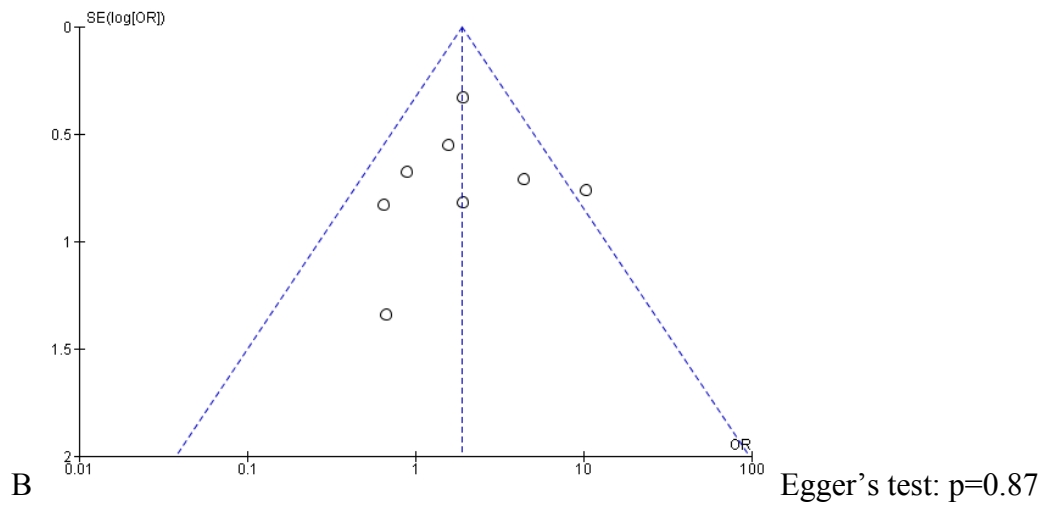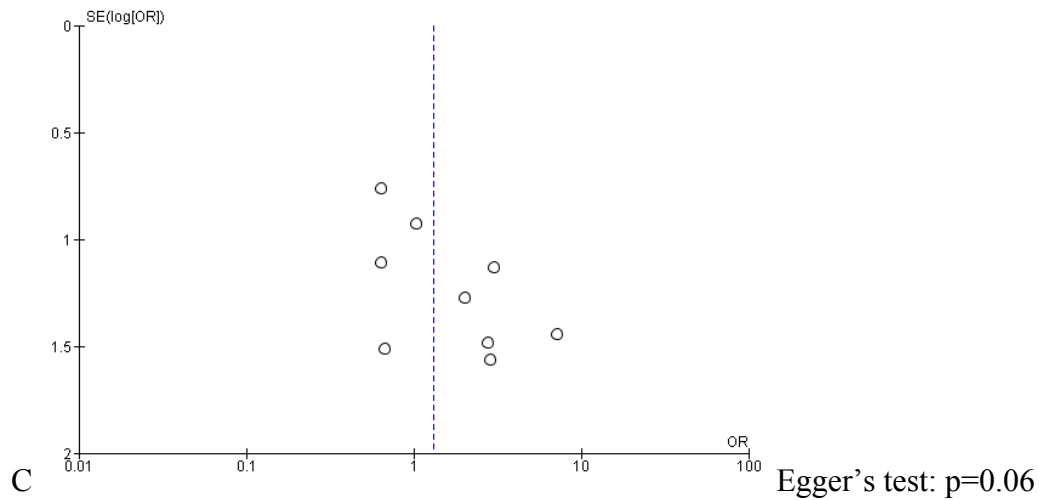

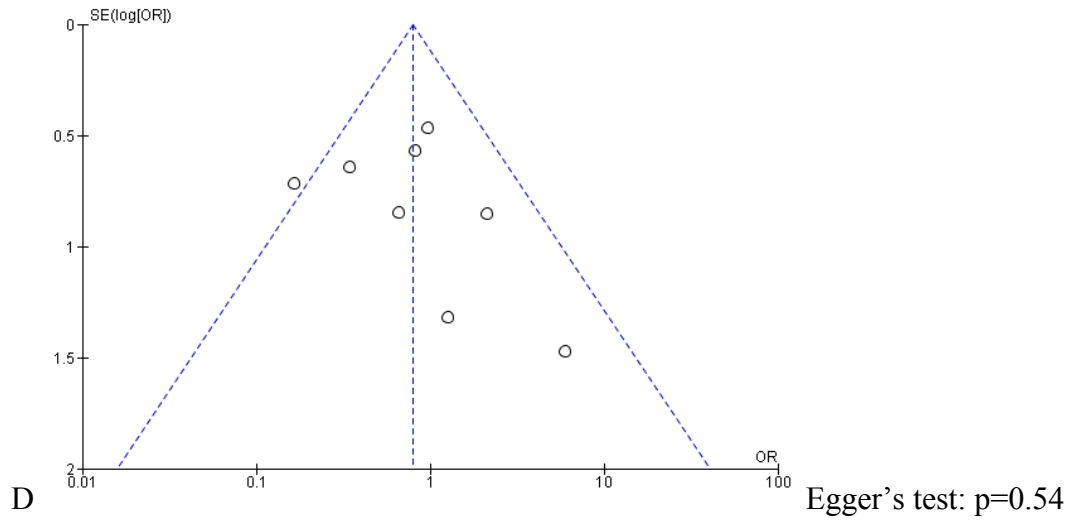

**Figure S4. Funnel plots and Egger's test results for (A) functional outcome at 90 days (modified Rankin Scale (mRS) score of 0–2), (B) Symptomatic intracranial hemorrhage (sICH), (C) mortality as outcomes in anterograde versus retrograde approach studies showing no asymmetry,**

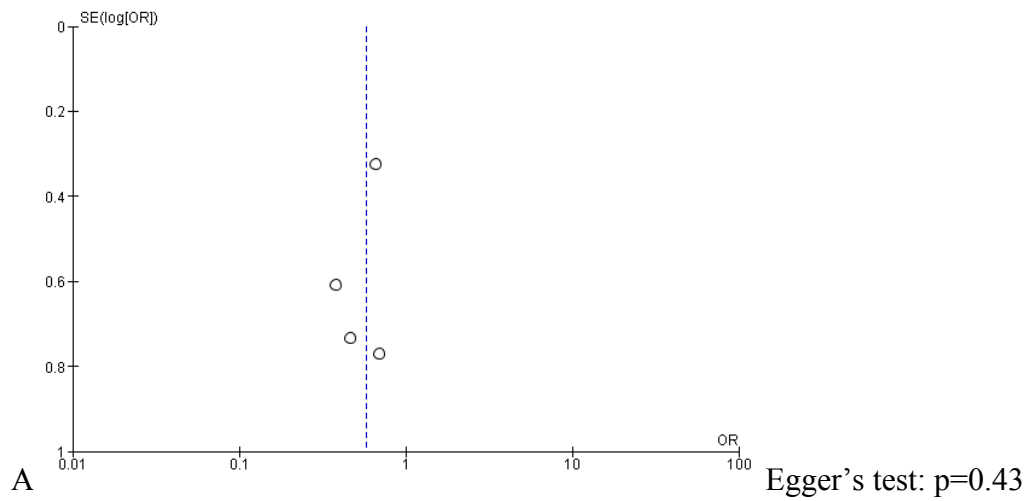

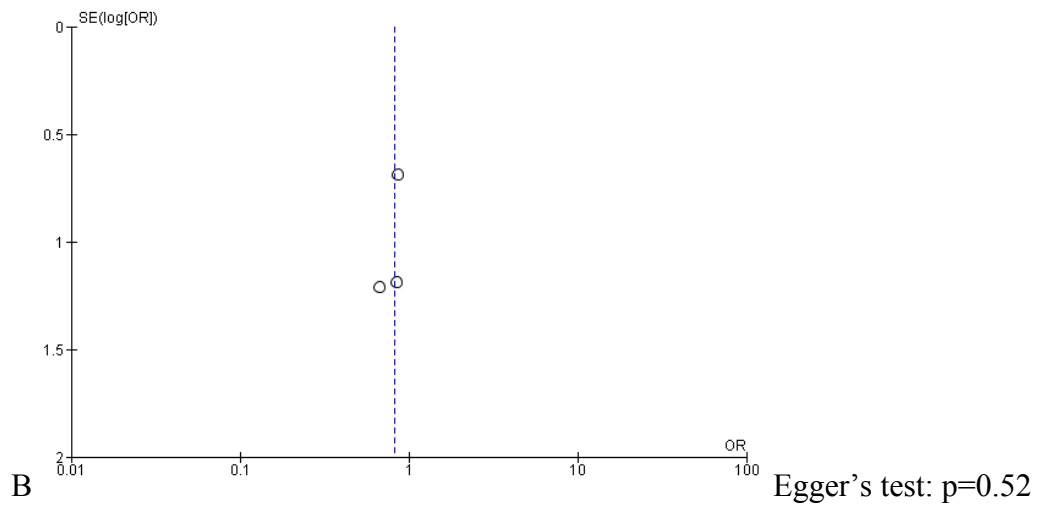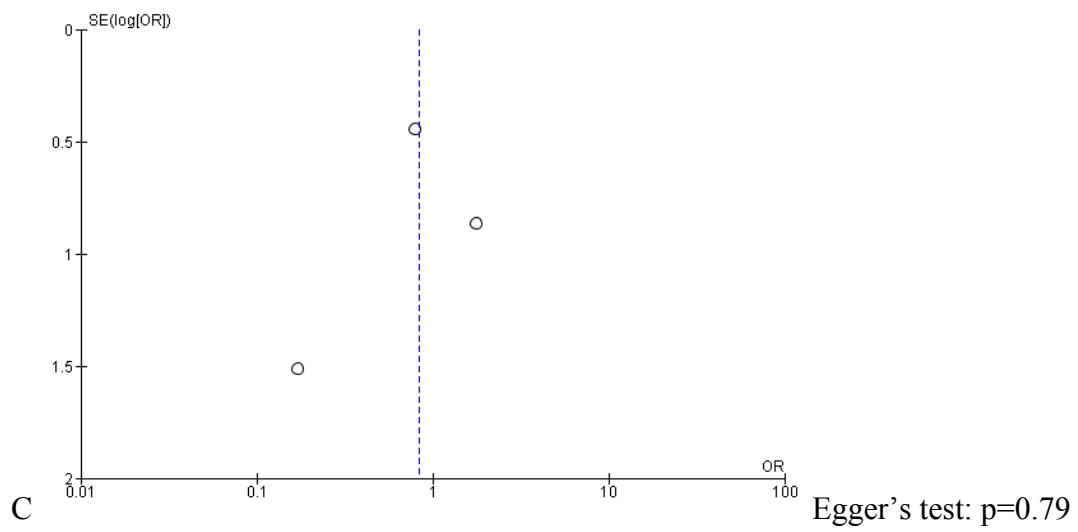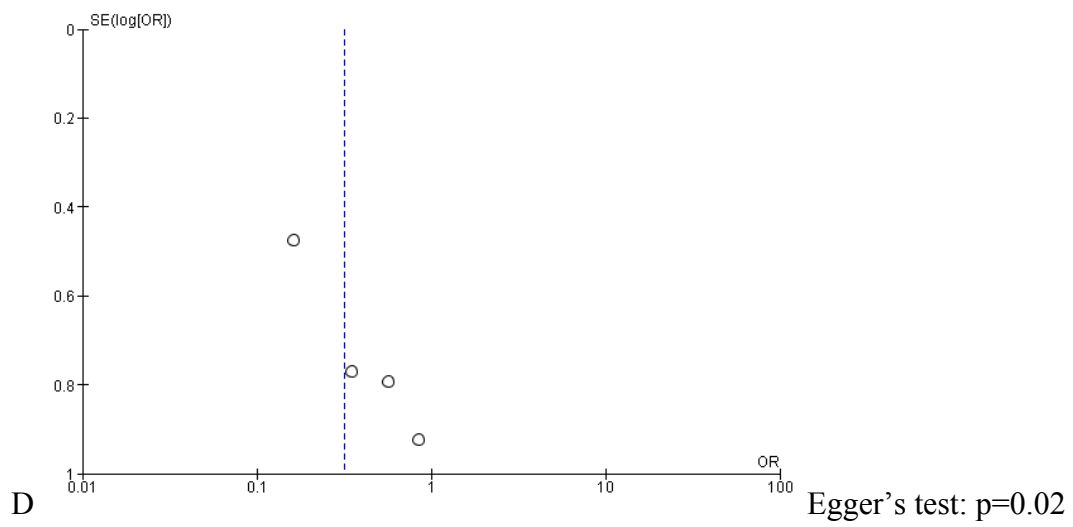



and (D) good reperfusion status Thrombolysis in Cerebral Infarction (TICI) 2b-3 showing asymmetry and possible bias.

**Figure S5. Funnel plot and Egger's test result for Symptomatic intracranial hemorrhage (sICH) as outcome in patients with acute stenting with of intravenous tissue plasminogen activator (IV tpA) versus without IV tpA showing no asymmetry.**

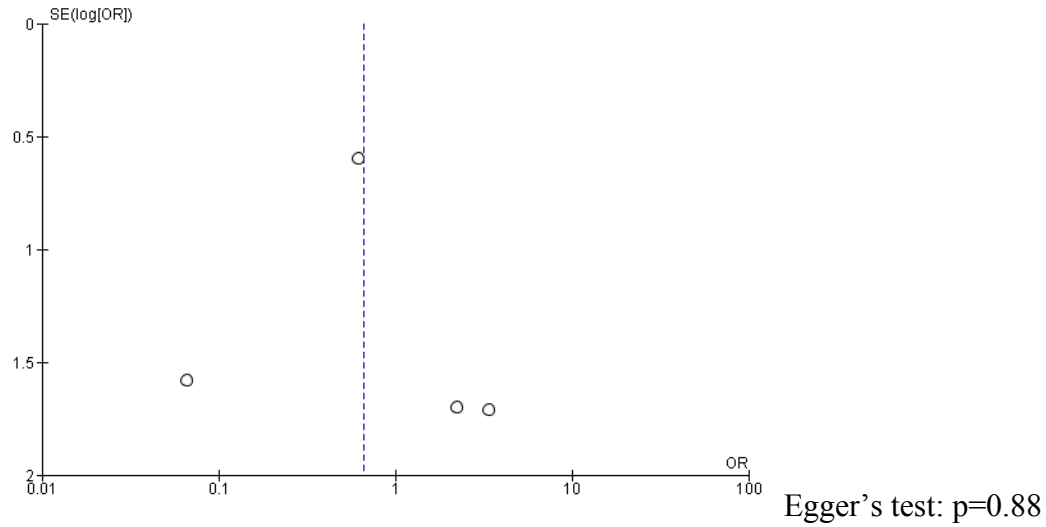

Supplement: JAH3-11-e022335-s001.pdf [file JAH3-11-e022335-s001.pdf]
